# Supplementary material for: Comparative Research on Metabolites of Different Species of Epichloë Endophytes and Their Host Achnatherum sibiricum
Source: MDPI journal article supplement (doi:10.3390/jof8060619), 2022-06-10
Supplement: s1 [file s1]

**Table S1.** Metabolites identified in mycelium of *E. gansuensis* (Eg) and *E. sibirica* (Es) from GC–MS analysis. The quantities are showed with “relative content  $\pm$  standard deviation”.

| Class         | Compound                  | Relative content    |                     |
|---------------|---------------------------|---------------------|---------------------|
|               |                           | Eg                  | Es                  |
| Amino acid    | Ser                       | 0.0100 $\pm$ 0.0017 | 0.0105 $\pm$ 0.0026 |
| Amino acid    | Thr                       | 0.0142 $\pm$ 0.0015 | 0.0143 $\pm$ 0.0018 |
| Amino acid    | Gly                       | 0.0058 $\pm$ 0.0012 | 0.0054 $\pm$ 0.0010 |
| Amino acid    | Hse                       | 0.0043 $\pm$ 0.0007 | 0.0047 $\pm$ 0.0012 |
| Amino acid    | Pro                       | 0.0913 $\pm$ 0.0081 | 0.0540 $\pm$ 0.0085 |
| Amino acid    | Asp                       | 0.0314 $\pm$ 0.0047 | 0.0328 $\pm$ 0.0094 |
| Amino acid    | Glu                       | 0.0152 $\pm$ 0.0013 | 0.0127 $\pm$ 0.0006 |
| Amino acid    | Asn                       | 0.0074 $\pm$ 0.0008 | 0.0075 $\pm$ 0.0015 |
| Amino acid    | Lys                       | 0.0136 $\pm$ 0.0011 | 0.0137 $\pm$ 0.0013 |
| Amino acid    | Tyr                       | 0.0050 $\pm$ 0.0010 | 0.0101 $\pm$ 0.0016 |
| Amino acid    | Phe                       | 0.0357 $\pm$ 0.0033 | 0.0388 $\pm$ 0.0048 |
| Sugar         | Fructose                  | 0.0022 $\pm$ 0.0004 | 0.0024 $\pm$ 0.0005 |
| Sugar         | Galactose                 | 0.0098 $\pm$ 0.0016 | 0.0104 $\pm$ 0.0022 |
| Sugar         | Talose                    | 0.0056 $\pm$ 0.0006 | 0.0055 $\pm$ 0.0008 |
| Sugar         | Trehalose                 | 1.0774 $\pm$ 0.0707 | 1.4133 $\pm$ 0.0531 |
| Sugar         | Mannobiose                | 0.0034 $\pm$ 0.0005 | 0.0034 $\pm$ 0.0005 |
| Sugar alcohol | Glycerol                  | 0.1139 $\pm$ 0.0138 | 0.1135 $\pm$ 0.0155 |
| Sugar alcohol | Threitol                  | 0.0066 $\pm$ 0.0009 | 0.0069 $\pm$ 0.0010 |
| Sugar alcohol | Erythritol                | 0.0062 $\pm$ 0.0008 | 0.0065 $\pm$ 0.0009 |
| Sugar alcohol | Arabitol                  | 0.0277 $\pm$ 0.0024 | 0.0283 $\pm$ 0.0027 |
| Sugar alcohol | Mannitol                  | 1.5818 $\pm$ 0.0990 | 1.6271 $\pm$ 0.0920 |
| Sugar alcohol | Inositol                  | 0.0274 $\pm$ 0.0031 | 0.0292 $\pm$ 0.0017 |
| Sugar alcohol | Sorbitol                  | 0.0700 $\pm$ 0.0040 | 0.0707 $\pm$ 0.0070 |
| Organic acid  | Butanedioic acid          | 0.0373 $\pm$ 0.0028 | 0.0379 $\pm$ 0.0028 |
| Organic acid  | Erythronic acid           | 0.0045 $\pm$ 0.0005 | 0.0053 $\pm$ 0.0009 |
| Organic acid  | Threonic acid             | 0.0064 $\pm$ 0.0005 | 0.0057 $\pm$ 0.0010 |
| Organic acid  | Ribonic acid              | 0.0043 $\pm$ 0.0006 | 0.0047 $\pm$ 0.0007 |
| Fatty acid    | Dodecanoic acid           | 0.0048 $\pm$ 0.0008 | 0.0050 $\pm$ 0.0006 |
| Fatty acid    | Tetradecanoic acid        | 0.0120 $\pm$ 0.0012 | 0.0119 $\pm$ 0.0020 |
| Fatty acid    | Pentadecanoic acid        | 0.0040 $\pm$ 0.0006 | 0.0043 $\pm$ 0.0007 |
| Fatty acid    | Hexadecanoic acid         | 0.2394 $\pm$ 0.0110 | 0.2498 $\pm$ 0.0164 |
| Fatty acid    | Heptadecanoic acid        | 0.0048 $\pm$ 0.0005 | 0.0049 $\pm$ 0.0007 |
| Fatty acid    | trans-9-Octadecenoic acid | 0.0253 $\pm$ 0.0017 | 0.0338 $\pm$ 0.0033 |
| Fatty acid    | $\alpha$ -Linolenic acid  | 0.0322 $\pm$ 0.0020 | 0.0529 $\pm$ 0.0028 |
| Fatty acid    | Octadecanoic acid         | 0.2708 $\pm$ 0.0273 | 0.2731 $\pm$ 0.0079 |

**Table S2.** Metabolites identified in leaves of *A. sibiricum* infected with *E. gansuensis* (Eg+), *E. sibirica* (Es+) and endophyte-free (E–) plants from GC–MS analysis. The quantities are showed with “relative content  $\pm$  standard deviation”.

| Class         | Compound                  | Relative content    |                     |                     |
|---------------|---------------------------|---------------------|---------------------|---------------------|
|               |                           | E–                  | Eg+                 | Es+                 |
| Amino acid    | Thr                       | 0.0214 $\pm$ 0.0034 | 0.0222 $\pm$ 0.0033 | 0.0220 $\pm$ 0.0027 |
| Amino acid    | Gly                       | 0.0051 $\pm$ 0.0005 | 0.0036 $\pm$ 0.0006 | 0.0041 $\pm$ 0.0003 |
| Amino acid    | Pro                       | 0.0331 $\pm$ 0.0065 | 0.0320 $\pm$ 0.0029 | 0.0359 $\pm$ 0.0023 |
| Amino acid    | Asp                       | 0.0398 $\pm$ 0.0022 | 0.0390 $\pm$ 0.0017 | 0.0402 $\pm$ 0.0047 |
| Amino acid    | Orn                       | 0.0069 $\pm$ 0.0004 | 0.0047 $\pm$ 0.0004 | 0.0048 $\pm$ 0.0007 |
| Amino acid    | Asn                       | 0.1671 $\pm$ 0.0095 | 0.1786 $\pm$ 0.0058 | 0.1785 $\pm$ 0.0117 |
| Amino acid    | Tyr                       | 0.0048 $\pm$ 0.0004 | 0.0153 $\pm$ 0.0021 | 0.0221 $\pm$ 0.0027 |
| Amino acid    | Phe                       | 0.0756 $\pm$ 0.0053 | 0.0950 $\pm$ 0.0045 | 0.0982 $\pm$ 0.0151 |
| Amino acid    | Val                       | 0.0068 $\pm$ 0.0004 | 0.0055 $\pm$ 0.0003 | 0.0050 $\pm$ 0.0005 |
| Amino acid    | Glu                       | 0.0043 $\pm$ 0.0004 | 0.0043 $\pm$ 0.0003 | 0.0042 $\pm$ 0.0005 |
| Amino acid    | Ser                       | 0.0044 $\pm$ 0.0004 | 0.0043 $\pm$ 0.0003 | 0.0043 $\pm$ 0.0003 |
| Sugar         | Fructose                  | 0.3100 $\pm$ 0.0208 | 0.5333 $\pm$ 0.0322 | 0.5600 $\pm$ 0.0317 |
| Sugar         | Glucose                   | 0.2459 $\pm$ 0.0268 | 0.4147 $\pm$ 0.0147 | 0.4368 $\pm$ 0.0380 |
| Sugar         | Allose                    | 0.2652 $\pm$ 0.0151 | 0.4160 $\pm$ 0.0096 | 0.4275 $\pm$ 0.0274 |
| Sugar         | Sucrose                   | 1.3474 $\pm$ 0.0819 | 2.3194 $\pm$ 0.0767 | 2.2509 $\pm$ 0.0887 |
| Sugar         | Maltose                   | 0.0378 $\pm$ 0.0043 | 0.0637 $\pm$ 0.0038 | 0.1102 $\pm$ 0.0095 |
| Sugar         | Galactose                 | 0.0236 $\pm$ 0.0016 | 0.0277 $\pm$ 0.0043 | 0.0235 $\pm$ 0.0016 |
| Sugar         | Melibiose                 | 0.0034 $\pm$ 0.0003 | 0.0036 $\pm$ 0.0003 | 0.0036 $\pm$ 0.0002 |
| Sugar         | $\beta$ -Gentiobiose      | 0.1181 $\pm$ 0.0144 | 0.1539 $\pm$ 0.0216 | 0.1233 $\pm$ 0.0113 |
| Sugar         | Lyxose                    | 0.0349 $\pm$ 0.0015 | 0.0346 $\pm$ 0.0028 | 0.0336 $\pm$ 0.0024 |
| Sugar alcohol | Glycerol                  | 0.0437 $\pm$ 0.0036 | 0.0445 $\pm$ 0.0041 | 0.0497 $\pm$ 0.0039 |
| Sugar alcohol | Inositol                  | 0.0595 $\pm$ 0.0061 | 0.0683 $\pm$ 0.0069 | 0.0514 $\pm$ 0.0053 |
| Sugar alcohol | Mannitol                  | –                   | 0.0330 $\pm$ 0.0033 | 0.0343 $\pm$ 0.0040 |
| Organic acid  | Hexanoic acid             | 0.0032 $\pm$ 0.0004 | 0.0034 $\pm$ 0.0004 | 0.0035 $\pm$ 0.0004 |
| Organic acid  | Butanedioic acid          | 0.4483 $\pm$ 0.0228 | 0.4508 $\pm$ 0.0365 | 0.4435 $\pm$ 0.0400 |
| Organic acid  | Malic acid                | 0.0515 $\pm$ 0.0057 | 0.0478 $\pm$ 0.0046 | 0.0542 $\pm$ 0.0064 |
| Organic acid  | Propanoic acid            | 0.0130 $\pm$ 0.0013 | 0.0135 $\pm$ 0.0012 | 0.0139 $\pm$ 0.0022 |
| Organic acid  | Butanoic acid             | 0.1159 $\pm$ 0.0113 | 0.1237 $\pm$ 0.0219 | 0.1298 $\pm$ 0.0160 |
| Organic acid  | Threonic acid             | 0.0036 $\pm$ 0.0003 | 0.0158 $\pm$ 0.0017 | 0.0141 $\pm$ 0.0027 |
| Organic acid  | Ribonic acid              | 0.0038 $\pm$ 0.0005 | 0.0065 $\pm$ 0.0004 | 0.0044 $\pm$ 0.0004 |
| Organic acid  | Sebacic acid              | 0.0628 $\pm$ 0.0047 | 0.0629 $\pm$ 0.0031 | 0.0683 $\pm$ 0.0098 |
| Fatty acid    | Tetradecanoic acid        | 0.0240 $\pm$ 0.0014 | 0.0249 $\pm$ 0.0018 | 0.0249 $\pm$ 0.0019 |
| Fatty acid    | Hexadecanoic acid         | 0.4493 $\pm$ 0.0170 | 0.4440 $\pm$ 0.0165 | 0.4532 $\pm$ 0.0191 |
| Fatty acid    | 9,12-Octadecadienoic acid | 0.0443 $\pm$ 0.0026 | 0.0453 $\pm$ 0.0027 | 0.0458 $\pm$ 0.0026 |
| Fatty acid    | $\alpha$ -Linolenic acid  | 0.1351 $\pm$ 0.0123 | 0.1721 $\pm$ 0.0086 | 0.2211 $\pm$ 0.0160 |
| Fatty acid    | Octadecanoic acid         | 0.4776 $\pm$ 0.0228 | 0.3545 $\pm$ 0.0148 | 0.3477 $\pm$ 0.0158 |
| Sterol        | Stigmasterol              | 0.0637 $\pm$ 0.0028 | 0.0645 $\pm$ 0.0022 | 0.0646 $\pm$ 0.0020 |
| Sterol        | $\beta$ -Sitosterol       | 0.1585 $\pm$ 0.0051 | 0.1699 $\pm$ 0.0171 | 0.1618 $\pm$ 0.0090 |
| Phenols       | $\alpha$ -Tocopherol      | 0.0249 $\pm$ 0.0025 | 0.0343 $\pm$ 0.0024 | 0.0362 $\pm$ 0.0010 |
